# Supplementary material
Source: PubMed Central journal article supplement (PMC8595510)
Supplement: NIHMS1720983-supplement-Supinfo.pdf [file NIHMS1720983-supplement-Supinfo.pdf]

## Supplementary Materials –

- **Supplementary Materials.** Social Isolation Scale Adaptation
- **Supplementary Figure 1.** Social Isolation Scale.
- **Supplementary Table 1.** Association of Social Isolation and Social Isolation Items with Frequent Loneliness in the Last Years of Life
- **Supplementary Table 2.** Prevalence of Social Isolation, Social Isolation Subscales, and Loneliness by Time Prior to Death
- **Supplementary Table 3.** Adjusted Prevalence of Loneliness and Social Isolation During the Last 4 Years of Life Across Subgroups

## Supplementary Materials: Social Isolation Scale Adaptation

We adapted a social isolation scale from prior scales in the literature including Shankar et al. (2011), Shaw et al. (2017), and Cornwell & Waite (2009). Our goal was to measure different dimensions of social relationships that may be relevant to end of life social well-being, and to have an overall social isolation scale combining these different dimensions which may reflect particularly severe situations of social isolation among older adults. Below we describe our approach and rationale to adapting a scale to the end-of-life experience.

We began with the Shankar et al. (2011) scale which includes three dimensions of social connections: 1) marital status (0-1 point), 2) social network interaction (0-3 points), and 3) community engagement (0-1 point), with a total range of 0-5 points. We decided to expand each domain and re-assess cut-offs within each domain to be more directly relevant to our research question in palliative care (described below). All 15 items from the HRS Core interview or Leave-Behind-Questionnaire (LBQ) included in our adapted measure are listed below:

1. Core contacts
  - a. 1 item (core) - Marital status
  - b. 1 item (core) - Household size
  - c. 1 item (core) – Number of Living children, Living within 10 miles from you.
2. Social Network Interaction
  - f. 3 items (LBQ) – Frequency of speaking with Kids/Family/Friends
  - g. 3 items (LBQ) – Frequency of e-mailing with Kids/Family/Friends
  - h. 3 items (LBQ) – Frequency of meeting with Kids/Family/Friends
3. Community participation
  - j. 1 item (Core) – Frequency of volunteer work
  - k. 1 item (LBQ) – Attendance at community groups
  - l. 1 item (Core) – Frequency of religious participation

We included a subscale for each of the three dimensions ranging 0-2 points, with a description of point values provided below:

1. *Household and core contacts (HCC) subscale.* Individuals approaching the end of life can have unique challenges when living alone at home. Individuals in the last days to months of life may be limited to their home due to the consequences of end-stages of chronic illness, acute illness, symptoms, or functional limitations. Consequently, local or in-home contacts may be essential for the provision of social support (caregiver and emotional support) and key medical support (e.g. home hospice eligibility, transportation to medical appointments, administering medications). Therefore we expanded marital status, which is used in several prior social isolation scales, to also include household size (excluding the spouse) and children living within 10 miles. This might better describe an individual's ability to find help with key medical needs at the end of life since nearly half our sample was widowed or unmarried. We categorize the subscale as: 1) None/Living alone (0 points), 2) 1 contact (1 point), or 3) 2+ contacts (2 points).
2. *Social Network Interaction Scale (SNI).* Social network interaction subscale is similar to the definition used in Shankar et al (2011) focusing on frequency of contact with children, family members, and friends through in-person, e-mail, or phone contact. This measure is distinct from household and core contacts in that it does not require relationships to be in the household or local area. Within each type of relationship (friends, family, or children) less than once a month was considered minimal interaction (0 points), which is similar to the Shankar et al. (2011) measure. In addition, we included categories for 1-2x/month as low interaction (1 point), and once per week as moderate interaction (2 points), yielding a range of 0-6 points. This was then re-scaled to the 0-2 point range as shown in the figure below.
3. *Community engagement Scale (CES).* Engagement in the community is less critical to the provision of medical support as the social interaction and core contact measures, yet, it may be equally or more important to well-being and quality of life. It captures an individual's ability to participate in more complex social tasks, opportunities to help others, and a sense of belongingness in the community. Three items measure structured social participation including volunteering, participation in religious services, and participation in social/community clubs. We approximated Shankar et al. (2011)'s cut-off of minimal engagement with any activity (0 points), "some" engagement with any activity (1 point), and moderate engagement (2-6 points) using the thresholds shown in the figure below. This was then re-scaled to a 0-2 point range.

While the individual scales are useful in providing detail on end-of-life social experiences, it is important to determine how multiple features of isolation *combine* to create particularly severe situations of social isolation among older adults.

We therefore combined the three subscales - HCC, IS, and CES - to generate an overall social isolation scale ranging 0-6 points. We categorized individuals scoring 0-2 points as socially isolated which resembled the bottom quintile of our sample (similar to the strategy used in Shaw et al. 2017), which aligned well with clinically meaningful cut-offs within each subscale. Robustness checks were conducted at different cut-offs which yielded similar results. Further research is required on appropriate cut-offs among seriously ill populations.

**Supplementary Figure 1. Social Isolation Scale**

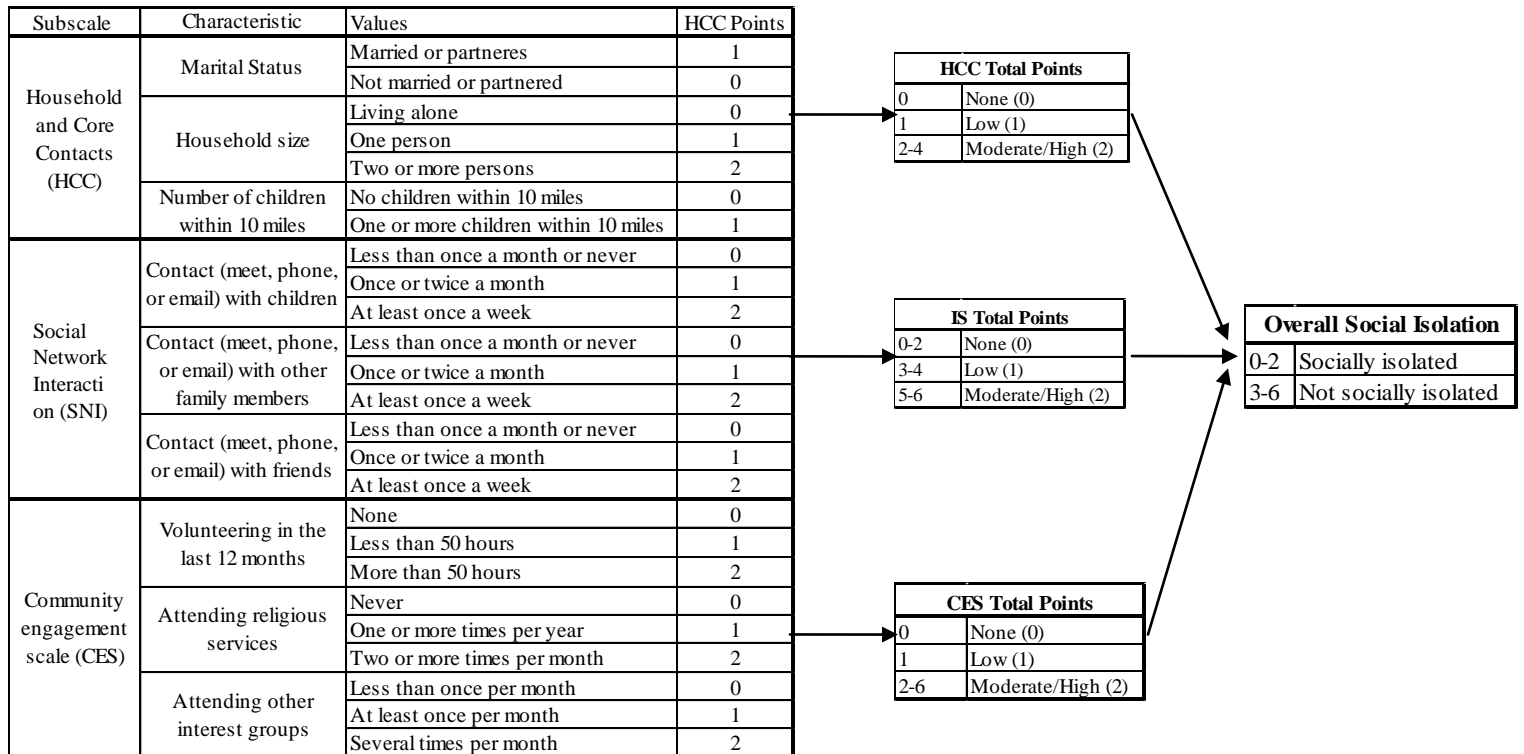

**Supplementary Table 1.** Association of Social Isolation and Social Isolation Items with Frequent Loneliness in the Last Years of Life

| Social Isolation Items                        |                      | Frequent Loneliness |         |
|-----------------------------------------------|----------------------|---------------------|---------|
|                                               |                      | % (95% CI)          | p-value |
| <b>Overall Social Isolation</b>               | No                   | 17 (15,20)          | <0.001  |
|                                               | Yes                  | 30 (24,37)          |         |
| <b>Household/Core Contacts</b>                |                      |                     |         |
| Marital Status                                | Married              | 12 (9,14)           | <0.001  |
|                                               | Unmarried            | 26 (23,30)          |         |
| Household Size                                | 1+ household members | 16 (14,18)          | <0.001  |
|                                               | Live Alone           | 27 (23,31)          |         |
| Nearby Children <sup>1</sup>                  | Nearby Children      | 18 (15,21)          | 0.03    |
|                                               | No nearby children   | 23 (20,26)          |         |
| <b>Social Network Interaction<sup>2</sup></b> |                      |                     |         |
| Interaction with Children                     | Moderate/High        | 18 (16,20)          | <0.001  |
|                                               | Low                  | 29 (23,34)          |         |
| Interaction with Family                       | Moderate/High        | 20 (17,22)          | 0.366   |
|                                               | Low                  | 21 (17,25)          |         |
| Interaction with Friends                      | Moderate/High        | 17 (14,19)          | <0.001  |
|                                               | Low                  | 29 (24,34)          |         |
| <b>Community Engagement</b>                   |                      |                     |         |
| Volunteer Activities <sup>3</sup>             | Yes                  | 12 (8,16)           | <0.001  |
|                                               | No                   | 22 (19,24)          |         |
| Religious Services <sup>4</sup>               | Yes                  | 17 (14,20)          | <0.001  |
|                                               | No                   | 24 (21,28)          |         |
| Community Groups <sup>5</sup>                 | Yes                  | 15 (12,18)          | <0.001  |
|                                               | No                   | 22 (19,25)          |         |

\*All estimates adjusted for time of interview prior-to-death, age, sex, race/ethnicity, education, comorbidities, and number of ADL impairment

<sup>1</sup> Nearby children determined by asking about the presence of children <10 miles away

<sup>2</sup> Low interaction with children, family and friends was defined as on average less than monthly interaction with each relationship through in-person, e-mail, or phone

<sup>3</sup> No volunteer work defined as self-reports of no volunteering in the last 12 months

<sup>4</sup> No religious activities defined as never attending religious services in the last 12 months

<sup>5</sup> No community group engagement defined as less than monthly attendance at any community group

**Supplementary Table 2.** Prevalence of Social Isolation, Social Isolation Subscales, and Loneliness by Time Prior to Death

| <b>Characteristics</b>                      | <b>Predicted Prevalence of Social Isolation Subscales by Time Prior to Death</b> |                |               |                 |                 | <b>P value</b> |
|---------------------------------------------|----------------------------------------------------------------------------------|----------------|---------------|-----------------|-----------------|----------------|
|                                             | <b>% (95% CI)</b>                                                                |                |               |                 |                 |                |
|                                             | <b>4 years</b>                                                                   | <b>2 years</b> | <b>1 year</b> | <b>6 months</b> | <b>3 months</b> |                |
| Social Isolation                            | 18 (14-21)                                                                       | 22 (20-24)     | 24 (20-29)    | 26 (20-31)      | 27 (20-34)      | 0.05           |
| Low Social Network Interaction <sup>1</sup> | 57 (54-61)                                                                       | 63 (61-64)     | 65 (62-68)    | 66 (63-70)      | 67 (63-71)      | 0.003          |
| Low Community Engagement <sup>2</sup>       | 42 (38-46)                                                                       | 47 (45-50)     | 50 (46-53)    | 51 (47-55)      | 52 (47-56)      | 0.01           |
| Few Household contacts <sup>3</sup>         | 45 (40-50)                                                                       | 46 (43-48)     | 46 (43-49)    | 46 (42-50)      | 46 (42-51)      | 0.64           |
| Frequent Loneliness <sup>4</sup>            | 18 (14-21)                                                                       | 29 (18-23)     | 22 (19-25)    | 23 (18-26)      | 23 (18-27)      | 0.13           |
| Any Loneliness <sup>5</sup>                 | 66 (62-70)                                                                       | 69 (68-72)     | 71 (68-73)    | 71 (68-75)      | 72 (68-76)      | 0.09           |

<sup>1</sup>The Social network interaction subscale assessed the frequency of at least monthly meetings with children, family, or friends through in-person, e-mail, or phone interactions. <sup>2</sup>Community engagement subscale included the frequency of participation in religious services, or other community groups and community volunteering. <sup>3</sup>Household and core contacts subscale included marital status, household size, and having nearby children. <sup>4</sup>Frequent Loneliness was defined as 4+ points on the UCLA loneliness scale (Range 0-6 points). <sup>5</sup>Any loneliness was defined as 1+ point on the UCLA Loneliness Scale (Range: 0-6 points). All prevalence estimates are derived from separate logistic regression models adjusting for the following covariates: time before death, age at death, sex, race/ethnicity, and education.

**Supplementary Table 3.** Adjusted Prevalence of Loneliness and Social Isolation During the Last 4 Years of Life Across Subgroups

| Characteristics      |                       | Loneliness |         | Social Isolation |         |
|----------------------|-----------------------|------------|---------|------------------|---------|
|                      |                       | % (95% CI) | p-value | % (95% CI)       | p-value |
| Age at death         | <=75                  | 23 (19,27) | 0.09    | 20 (17,24)       | 0.25    |
|                      | >75                   | 19 (17,22) |         | 23 (20,25)       |         |
| Gender               | Male                  | 17 (14,20) | 0.004   | 23 (20,25)       | 0.33    |
|                      | Female                | 23 (20,26) |         | 21 (18,24)       |         |
| Marital Status       | Not Married/Partnered | 26 (23,30) | <0.001  | -                | -       |
|                      | Married/Partnered     | 12 (9,14)  |         | -                |         |
| Race/Ethnicity       | White                 | 21 (19,24) | Ref     | 23 (20,26)       | Ref     |
|                      | AA                    | 14 (8,20)  | 0.04    | 18 (11,24)       | 0.15    |
|                      | Latino                | 24 (18,30) | 0.36    | 21 (12,30)       | 0.68    |
|                      | Other                 | 22 (5,39)  | 0.90    | 9 (1,17)         | 0.02    |
| Education            | >=HS                  | 19 (16,22) | 0.16    | 19 (17,21)       | 0.003   |
|                      | <HS                   | 23 (18,27) |         | 27 (22,32)       |         |
| Net Worth            | <6,000                | 29 (23,36) | <0.001  | 34 (27,40)       | <0.001  |
|                      | 6,000-<81,000         | 21 (17,25) |         | 20 (15,26)       |         |
|                      | 81,000-<239,000       | 17 (13,22) |         | 20 (15,24)       |         |
|                      | >=239,000             | 13 (10,16) |         | 14 (11,18)       |         |
| Cancer               | No                    | 22 (19,25) | 0.04    | 24 (21,26)       | 0.01    |
|                      | Yes                   | 16 (12,19) |         | 17 (13,21)       |         |
| Diabetes             | No                    | 19 (17,22) | 0.23    | 22 (19,25)       | 0.89    |
|                      | Yes                   | 22 (18,27) |         | 22 (17,26)       |         |
| Lung disease         | No                    | 20 (18,23) | 0.94    | 20 (18,23)       | 0.03    |
|                      | Yes                   | 20 (15,25) |         | 27 (22,33)       |         |
| Stroke               | No                    | 19 (17,22) | 0.13    | 21 (19,24)       | 0.47    |
|                      | Yes                   | 23 (18,28) |         | 24 (17,30)       |         |
| Heart disease        | No                    | 20 (15,24) | 0.83    | 22 (18,26)       | 0.99    |
|                      | Yes                   | 21 (16,25) |         | 22 (18,25)       |         |
| Any ADL Dependence   | No                    | 19 (16,22) | 0.22    | 20 (16,23)       | 0.06    |
|                      | Yes                   | 23 (18,28) |         | 26 (21,31)       |         |
| Telephone Difficulty | No                    | 19 (16,22) | 0.12    | 21 (18,24)       | 0.43    |
|                      | Yes                   | 24 (18,30) |         | 25 (17,33)       |         |

|                                 |          |            |        |            |       |
|---------------------------------|----------|------------|--------|------------|-------|
| Managing Money Difficulty       | No       | 17 (15,20) | 0.002  | 20 (17,22) | 0.04  |
|                                 | Yes      | 25 (21,30) |        | 25 (20,30) |       |
| Medications Difficulty          | No       | 20 (17,23) | 0.48   | 21 (19,24) | 0.67  |
|                                 | Yes      | 23 (16,29) |        | 24 (14,33) |       |
| Shopping Difficulty             | No       | 17 (14,20) | 0.007  | 18 (15,22) | 0.008 |
|                                 | Yes      | 24 (20,28) |        | 26 (22,30) |       |
| Preparing Meals Difficulty      | No       | 15 (13,17) | <0.001 | 19 (16,21) | 0.003 |
|                                 | Yes      | 29 (25,34) |        | 27 (22,31) |       |
| Walking a block difficulty      | No       | 15 (13,17) | <0.001 | 19 (15,23) | 0.04  |
|                                 | Yes      | 26 (22,29) |        | 25 (21,28) |       |
| Cognition                       | Normal   | 16 (14,18) | 0.01   | 19 (16,21) | 0.07  |
|                                 | CIND     | 21 (17,24) |        | 22 (18,26) |       |
|                                 | Dementia | 25 (19,31) |        | 25 (19,31) |       |
| Vision impairment               | No       | 17 (14,20) | 0.006  | 20 (16,23) | 0.06  |
|                                 | Yes      | 24 (20,28) |        | 25 (21,28) |       |
| Hearing impairment              | No       | 17 (14,19) | <0.001 | 20 (16,23) | 0.02  |
|                                 | Yes      | 26 (22,30) |        | 26 (22,29) |       |
| Current Pain                    | No       | 18 (16,21) | 0.02   | 21 (19,24) | 0.69  |
|                                 | Yes      | 24 (20,28) |        | 22 (18,27) |       |
| Incontinence                    | No       | 16 (14,18) | <0.001 | 22 (18,25) | 0.80  |
|                                 | Yes      | 27 (23,31) |        | 22 (18,26) |       |
| Hospitalization in last 2 years | No       | 19 (16,21) | 0.07   | 24 (20,28) | 0.10  |
|                                 | Yes      | 22 (19,25) |        | 20 (17,23) |       |

Each regression model adjusts for time before death, age, sex, race/ethnicity, education, comorbidities, and number of ADL impairment

Abbreviations: AA – African American, HS – High School, CIND – Cognitive Impairment Not Dementia;

<sup>1</sup>Marital Status was not included in the social isolation regression model as it was part of the definition of social isolation; <sup>2</sup> Net Worth was calculated as sum of all assets minus the sum of all debts. <sup>3</sup>Cognitive Impairment was defined using the Langa-Weir methods; <sup>4</sup>Frequent loneliness was defined using the UCLA 3-item Loneliness Scale with cut-off of 4-6 points; <sup>5</sup>Social Isolation was defined by combining the Household, Social Network Interaction, and Community Engagement subscales to create a 0-6 point scale with 0-2 points categorized as socially isolated.
